# Supplementary material for: Integrated meta-omics reveals new ruminal microbial features associated with feed efficiency in dairy cattle
Source: PubMed Central journal article supplement (PMC8849036; doi:10.1186/s40168-022-01228-9), 2022-02-16

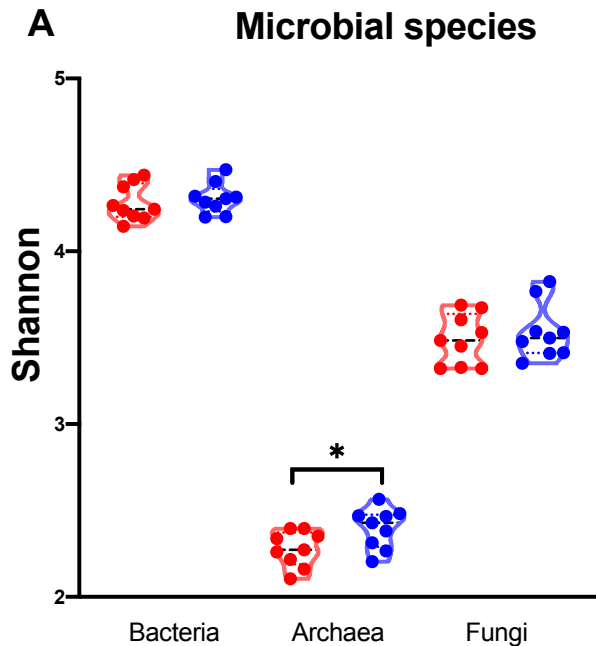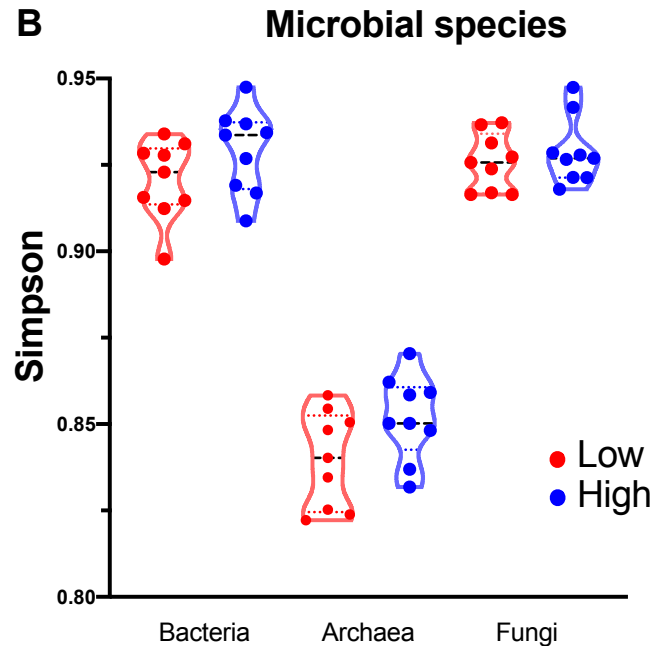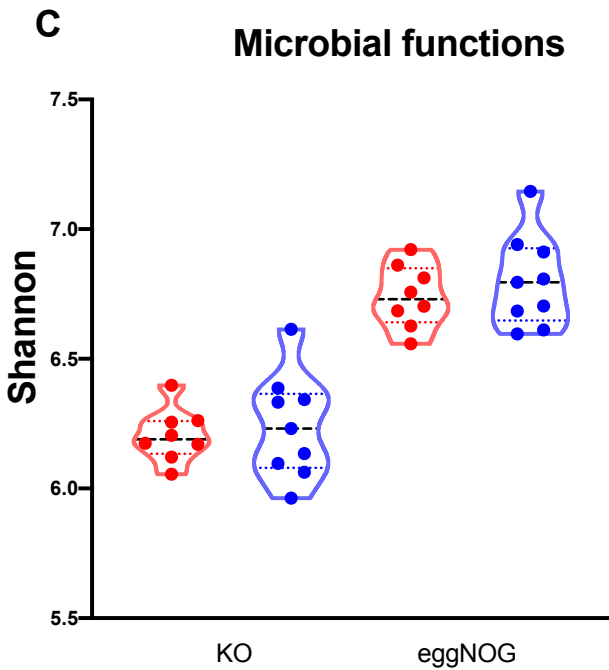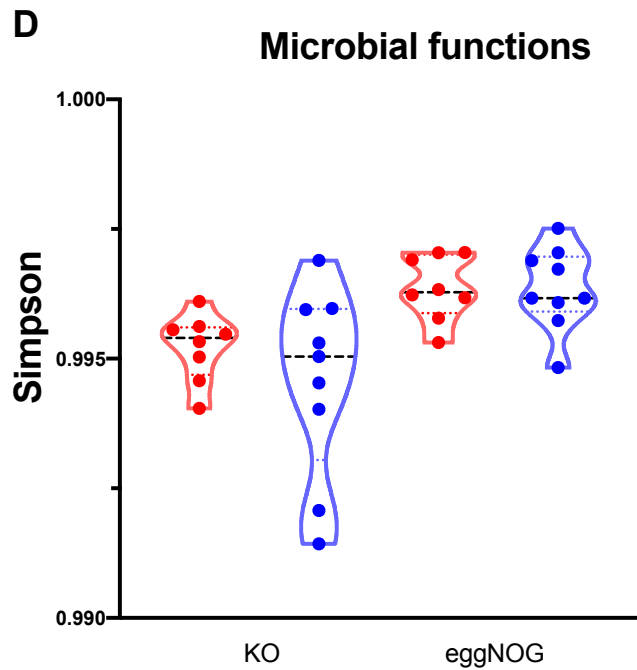

Supplement: 40168_2022_1228_MOESM4_ESM.pdf [file 40168_2022_1228_MOESM4_ESM.pdf]
